# Supplementary material for: Electrospun VSe1.5/CNF composite with excellent performance for alkali metal ion batteries
Source: Royal Society of Chemistry journal article supplement (doi:10.1039/c9nr03574e), 2019-01-01
Supplement: c9nr03574e1.pdf [file c9nr03574e1.pdf]

## Supporting Information

### Electrospun VSe<sub>1.5</sub>/CNFs composite with excellent performance for alkali metal ion batteries

Lihong Xu<sup>‡a</sup>, Peixun Xiong<sup>‡b</sup>, Lingxing Zeng<sup>\*a, c, e</sup>, Yixing Fang<sup>a</sup>, Renpin Liu<sup>a</sup>, Junbin Liu<sup>a</sup>, Fenqiang Luo<sup>a, c</sup>, Qinghua Chen<sup>a, d, e</sup>, Mingdeng Wei<sup>b</sup>, and Qingrong Qian<sup>\*a, c, e</sup>

<sup>a</sup> Engineering Research Center of Polymer Green Recycling of Ministry of Education, College of Environmental Science and Engineering, Fujian Normal University, Fuzhou, Fujian 350007, China. EMAIL: zenglingxing@fjnu.edu.cn; qrqian@fjnu.edu.cn; Tel: +86-591- 83465156

<sup>b</sup> Institute of Advanced Energy Materials, Fuzhou University, Fuzhou, Fujian 350002, China.

<sup>c</sup> Fujian Key Laboratory of Pollution Control & Resource Reuse, Fuzhou, Fujian 350007, China.

<sup>d</sup> Fuqing Branch of Fujian Normal University, Fuqing, Fujian 350300, China.

<sup>e</sup> Chemistry Post-Doctoral Station, Fujian Normal University, Fuzhou, Fujian 350007, China.

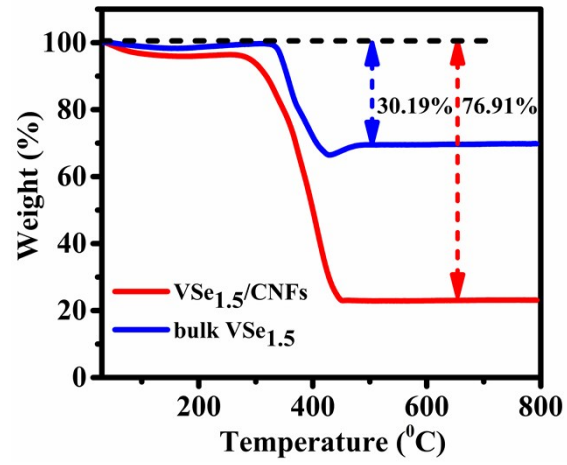

Fig. S1 TG curves of the bulk VSe<sub>1.5</sub> and VSe<sub>1.5</sub>/CNFs composite.

Table S1 Electrochemical performance comparison of the as-prepared VSe<sub>1.5</sub>/CNFs with other V-based anode materials for LIBs/SIBs/KIBs.

| Electrode materials                     | Fields | Cycling capacity (mA h g <sup>-1</sup> ) | Rate capability (mA h g <sup>-1</sup> ) | Year/Ref. |
|-----------------------------------------|--------|------------------------------------------|-----------------------------------------|-----------|
| VSe <sub>2</sub> NSA/C                  | LIBs   | 768<br>(50cycles /0.1 A/g)               | 571<br>(2 A/g)                          | 2018/[S1] |
|                                         | SIBs   | 571<br>(50 cycles /0.1 A/g)              | 450<br>(0.5 A/g)                        |           |
| VSe <sub>2</sub> ultrathin nanosheets   | PIBs   | 366<br>(200 cycles /0.1A/g)              | 169<br>(500 cycles /2 A/g)              | 2018/[S2] |
| V <sub>2</sub> O <sub>3</sub> @PNCNFs   | PIBs   | ~230<br>(500 cycles /0.05A/g)            | 134<br>(1.0 A/g)                        | 2018/[S3] |
| V <sub>2</sub> O <sub>3</sub> /carbon   | LIBs   | 587<br>(200 cycles /0.1 A/g)             | 219<br>(2 A/g)                          | 2017/[S4] |
|                                         | SIBs   | 270<br>(150 cycles /0.1 A/g)             | ~150<br>(1000 cycles /1 A/g)            |           |
| V <sub>5</sub> S <sub>8</sub> -graphite | SIBs   | 496<br>(500 cycles /1 A/g)               | 344<br>(10 A/g)                         | 2017/[S5] |
| VS <sub>2</sub> nanosheets              | SIBs   | 620<br>(50 cycles /0.1 A/g)              | 277<br>(20 A/g)                         | 2018/[S6] |
| c-VS <sub>2</sub> @VOOH                 | SIB    | 330<br>(150 cycles /0.2 A/g)             | 356<br>(0.5 A/g)                        | 2017/[S7] |
|                                         |        |                                          | 224<br>(1 A/g)                          |           |
| VS <sub>2</sub>                         | SIB    | 403<br>(200 cycles /0.2 A/g)             | 193<br>(0.5 A/g)                        | 2018[S8]  |
|                                         |        |                                          | 172<br>(1 A/g)                          |           |
| VSe <sub>1.5</sub> /CNFs                | LIBs   | 821<br>(200 cycles /0.5 A/g)             | 932<br>(400 cycles /1 A/g)              | This work |
|                                         | SIBs   | 668<br>(50 cycles /0.05 A/g)             | 265<br>(6000 cycles /2 A/g)             |           |
|                                         | PIBs   | 313<br>(40 cycles /0.1 A/g)              | 177<br>(100 cycles /1 A/g)              |           |

**Ref.**

- S1 F. Ming, H. Liang, Y. Lei, W. Zhang and H. N. Alshareef, *Nano Energy*, 2018, **53**, 11-16.
- S2 C. Yang, J. Feng, F. L. J. Zhou, C. Lin, K. Wang, Y. Zhang, Y. Yang, W. Wang, J. Li and S. Guo, *Adv. Mater.*, 2018, **30**, 1800036.
- S3 T. Jin, H. Li, Y. Li, L. Jiao and J. Chen, *Nano Energy*, 2018, **50**, 462-467.
- S4 X. An, H. Yang, Y. Wang, Y. Tang, S. Liang, A. Pan and G. Cao, *Sci. China Mater.*, 2017, **60**, 717-727.
- S5 C. Yang, X. Ou, X. Xiong, F. Zheng, R. Hu, Y. Chen, M. Liu and K. Huang, *Energy Environ. Sci.*, 2017, **10**, 107-113..
- S6 D. Yu, Q. Pang, Y. Gao, Y. Wei, C. Wang, G. Chen and F. Du, *Energy Storage Mater.*, 2018, **11**, 1-7.
- S7 W. Li, J. Huang, L. Feng, L. Cao, Y. Feng, H. Wang, J. Li and C. Yao, *J. Mater. Chem. A*, 2017, **5**, 20217-20227.
- S8 W. Li, J. Huang, L. Feng, L. Cao, Y. Liu and L. Pan, *Electrochim. Acta*, 2018, **286**, 131-138.

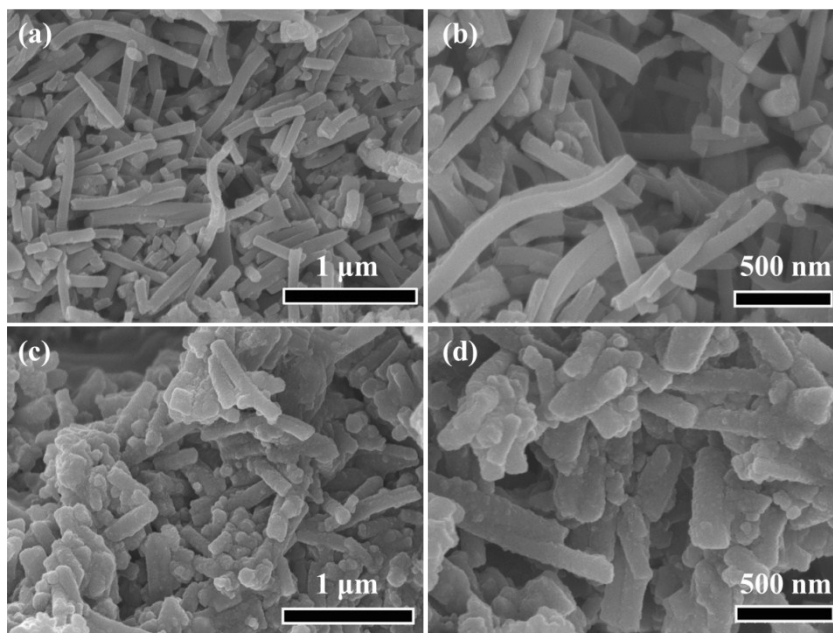

Fig. S2 SEM images of VSe<sub>1.5</sub>/CNFs electrode (a-b) before cycling and (c-d) after 100 cycles at 200 mA g<sup>-1</sup> for sodium storage.

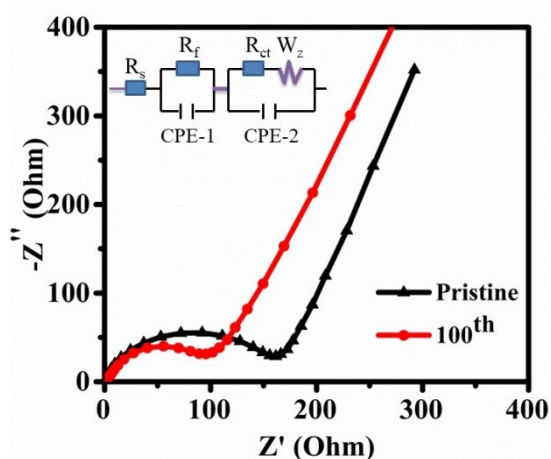

Fig. S3 Nyquist plots of VSe<sub>1.5</sub>/CNFs electrode after different cycles for SIBs.

Table S2 Impedance parameters calculated from an equivalent circuit model.

| Sample   | R <sub>s</sub> (Ω) | R <sub>f</sub> (Ω) | R <sub>ct</sub> (Ω) |
|----------|--------------------|--------------------|---------------------|
| Pristine | 19.5               | 746.9              | 303.8               |
| 100th    | 19.6               | 298.2              | 252.4               |

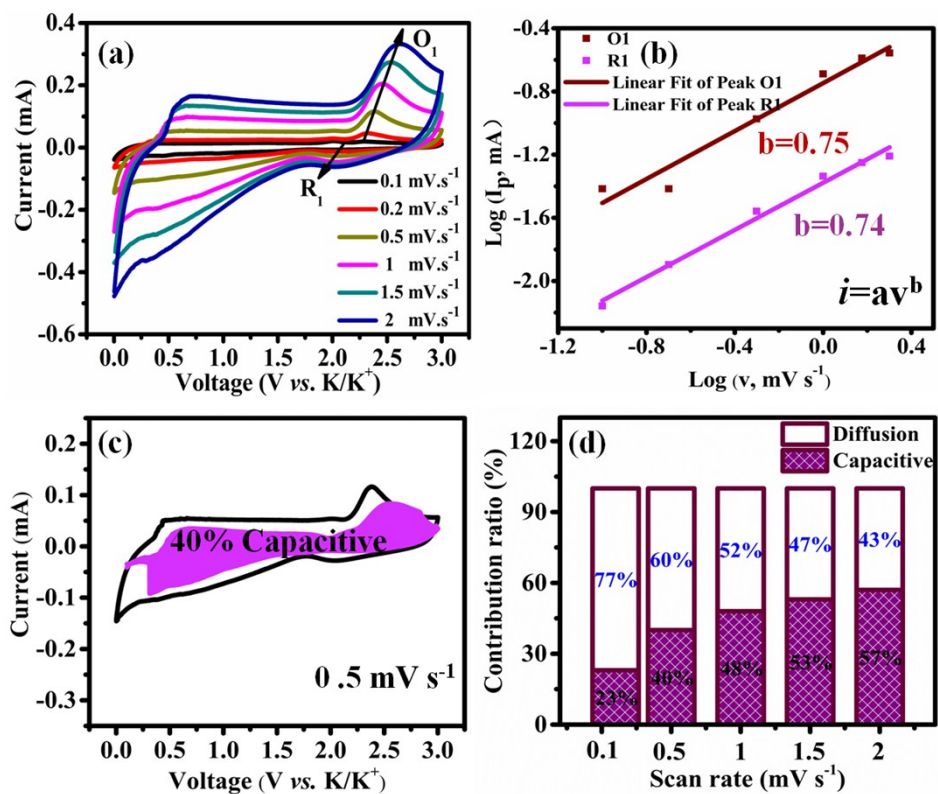

Fig. S4 (a) Cyclic voltammetry curves of VSe<sub>1.5</sub>/CNFs electrode for PIBs at different scan rates of 0.1, 0.2, 0.5, 1, 1.5 and 2.0 mVs<sup>-1</sup>. (b) log (*i*) vs. log (*v*) plots at different oxidation and reduction peaks. (c) Capacitive contribution (purple area) of VSe<sub>1.5</sub>/CNFs at 0.5 mV s<sup>-1</sup>. (d) The diffusion controlled (white) and capacitive (purple) capacities of VSe<sub>1.5</sub>/CNFs at different scan rates.
